# Supplementary material for: Dipyridamole-loaded 3D-printed bioceramic scaffolds stimulate pediatric bone regeneration in vivo without disruption of craniofacial growth through facial maturity
Source: PubMed Central journal article supplement (PMC6895073; doi:10.1038/s41598-019-54726-6), 2019-12-05
Supplement: 41598_2019_54726_MOESM1_ESM.pdf [file 41598_2019_54726_MOESM1_ESM.pdf]

**“Dipyridamole-loaded 3D-printed bioceramic scaffolds stimulate pediatric bone regeneration in vivo without disruption of craniofacial growth through facial maturity”**

**Supplemental Items**

Maxime M. Wang BA<sup>1,2\*</sup>, Roberto L. Flores MD<sup>2</sup>, Lukasz Witek MSci PhD<sup>1</sup>, Andrea Torroni MD<sup>2</sup>,

Amel Ibrahim MD PhD<sup>1,2</sup>, Zhong Wang BS<sup>1</sup>, Hannah A. Liss BA<sup>1</sup>, Bruce N. Cronstein MD<sup>3</sup>,

Christopher D. Lopez MD<sup>1</sup>, Samantha G. Maliha MD MSci<sup>2</sup>, Paulo G. Coelho DDS PhD<sup>1,2,4</sup>

<sup>1</sup> Department of Biomaterials & Biomimetics, NYU College of Dentistry, 433 1<sup>st</sup> Avenue, New York NY 10010

<sup>2</sup> Hansjörg Wyss Department of Plastic Surgery, NYU Langone Health, 307 E 33<sup>rd</sup> St, New York NY 10016

<sup>3</sup> Department of Medicine, NYU Langone Health, 550 1<sup>st</sup> Avenue, New York NY 10016

<sup>4</sup> Department of Mechanical Engineering, NYU Tandon School of Engineering, 6 MetroTech Center, Brooklyn NY 11201

**Corresponding Author**

Mr. Maxime M. Wang, BA  
307 E 33<sup>rd</sup> St  
New York, NY 10016  
+1 (212) 263-3030  
maxime.wang@nyulangone.org

| <b>Group</b>                                               | <b>N</b> |
|------------------------------------------------------------|----------|
| Scaffold-repaired Animals (2 Unilateral Defects/ Animal)   | 8        |
| Calvarial Defects (n=8)                                    |          |
| Alveolar Defects (n=8)                                     |          |
| Bone-graft-repaired Animals (2 Unilateral Defects/ Animal) | 8        |
| Calvarial Defects (n=8)                                    |          |
| Alveolar Defects (n=8)                                     |          |
| Un-operated age-matched control Animals                    | 6        |

**Supplemental Table 1:** Breakdown of experimental groups including number of animals and defects per group
